# Supplementary material for: Self-assembly of colloidal magnetic particles: energy landscapes and structural transitions
Source: Royal Society of Chemistry journal article supplement (doi:10.1039/c6cp03085h), 2016-01-01
Supplement: c6cp03085h1.pdf [file c6cp03085h1.pdf]

## Supplementary material for the manuscript “Self-assembly of colloidal magnetic particles: Energy landscapes and structural transitions”

J. Hernández-Rojas<sup>a,\*</sup>, D. Chakrabarti<sup>b,†</sup> and D. J. Wales<sup>c‡</sup>

<sup>a</sup> *Departamento de Física and IUdEA,  
Universidad de La Laguna, 38205, La Laguna, Tenerife, Spain*

<sup>b</sup> *School of Chemistry, University of Birmingham,  
Edgbaston, Birmingham B15 2TT, United Kingdom and*

<sup>c</sup> *University Chemical Laboratories, Lensfield Road,  
Cambridge CB2 1EW, United Kingdom*

---

\*Electronic address: [jhrojas@ull.es](mailto:jhrojas@ull.es)

†Electronic address: [d.chakrabarti@bham.ac.uk](mailto:d.chakrabarti@bham.ac.uk)

‡Electronic address: [dw34@cam.ac.uk](mailto:dw34@cam.ac.uk)

## **I. SUPPLEMENTARY MOVIE 1 LEGEND**

Movie for the fastest pathway connecting the chain structure with the global minimum for  $N = 14$ .

## **II. SUPPLEMENTARY MOVIE 2 LEGEND**

Movie for the fastest pathway connecting the two lowest energy minima for  $N = 27$ .

## **III. SUPPLEMENTARY MOVIE 3 LEGEND**

Movie for the fastest pathway between a ring and a chain structure for  $N = 13$  at magnetic field  $B^* = 0.7$ . The magnetic field vector is perpendicular to the page.

## **IV. SUPPLEMENTARY MOVIE 4 LEGEND**

Movie for the fastest pathway between a ring and a chain structure for  $N = 13$  at magnetic field  $B^* = 0.8$ . The magnetic field vector is perpendicular to the page.

## **V. SUPPLEMENTARY MOVIE 5 LEGEND**

Movie for the fastest pathway between a ring and a chain structure for  $N = 13$  at magnetic field  $B^* = 0.9$ . The magnetic field vector is perpendicular to the page.

## **VI. SUPPLEMENTARY MOVIE 6 LEGEND**

Movie for the fastest pathway between a ring and a chain structure for  $N = 13$  at magnetic field  $B^* = 1.5$ . The magnetic field vector is perpendicular to the page.

## **VII. SUPPLEMENTARY DATA**

Energy and coordinates of the global minima of spherical magnets up to  $N = 50$ .
